# Supplementary material for: Viruses Associated with Ovarian Degeneration in Apis mellifera L. Queens
Source: PubMed Central journal article supplement (PMC3026828; doi:10.1371/journal.pone.0016217), 2011-01-25
Supplement: pone.0016217.s001.pdf [file pone.0016217.s001.pdf]

SUPPLEMENTARY FILE / Table 4.

|                         | Target                     | primers                                               | sequence (5' - 3')                                      | size (bp) | Molarity | E    | T <sub>m</sub> (°C) | References |
|-------------------------|----------------------------|-------------------------------------------------------|---------------------------------------------------------|-----------|----------|------|---------------------|------------|
| Qualitative PCR assays  | DWV                        | DWV-F1425<br>DWV-B1806                                | CGTCGGCCTATCAAAG<br>CTTTTCTAATTCAACTTCACC               | 417       | 0.4 μM   | n.a. | n.a.                | [23]       |
|                         | VDV-1                      | VDV1-F1409<br>DWV-B1806                               | GCCCTGTCAAGAACATG<br>CTTTTCTAATTCAACTTCACC              | 430       | 0.4 μM   | n.a. | n.a.                | [23]       |
|                         | SBV                        | SBV-F<br>SBV-R                                        | GGATGAAAGGAAATTACCAG<br>CCACTAGGTGATCCACACT             | 426       | 0.4 μM   | n.a. | n.a.                | [46]       |
|                         | SBPV                       | SBPV-F3177<br>SBPV-R3363                              | GCGCTTTAGTTCAATTGCC<br>ATTATAGGACGTGAAAATATAC           | 226       | 0.4 μM   | n.a. | n.a.                | [65]       |
|                         | VdMLV                      | VdMLV-F<br>VdMLV-R                                    | ATCCCTTTTCAGTTCGCT<br>AGAAGAGACTTCAAGGAC                | 438       | 0.4 μM   | n.a. | n.a.                |            |
|                         | BQCV                       | BQCV-F<br>BQCV-R                                      | GTCAGTGTGATATTGCCAA<br>TCATTAGAAAGGCCAGACT              | 550       | 0.4 μM   | n.a. | n.a.                | [46]       |
|                         | ABPV                       | ABPV-F<br>ABPV-R                                      | CTCAAGTTATACGTAATAATAGCTGGAATT<br>AACCAACCTTGCTTCCCTTTA | 646       | 0.4 μM   | n.a. | n.a.                | [46]       |
|                         | KBV                        | KBV-F<br>KBV-R                                        | GATGAACGTCGACCTATTGA<br>TGTGGGTTGGCTATGAGTCA            | 414       | 0.4 μM   | n.a. | n.a.                | [46]       |
|                         | IAPV                       | IAPV-F6627<br>IAPV-R6707                              | CCATGCCTGGCGATTAC<br>CTGAATAATACTGTGCGTATC              | 203       | 0.4 μM   | n.a. | n.a.                |            |
|                         | CBPV                       | CBPV-F<br>CBPV-R                                      | AGTTGTCATGGTTAACAGGATACGAG<br>TCTAATCTTAGCACGAAAGCCGAG  | 455       | 0.4 μM   | n.a. | n.a.                | [46]       |
|                         | Target                     | primers                                               | sequence (5' - 3')                                      | size (bp) | Molarity | E    | T <sub>m</sub> (°C) | References |
| Quantitative PCR assays | DWV                        | DWVq-F<br>DWVq-R                                      | GGATGTTATCTCCTGCGTGGAA<br>CCTCATTAACGTGTCGTTGATAATTG    | 69        | 0.4 μM   | 1.96 | 78.5                | [64]       |
|                         | VDV-1                      | VDV1-F1409<br>DWV-B1806                               | GCCCTGTCAAGAACATG<br>CTTTTCTAATTCAACTTCACC              | 430       | 0.4 μM   | 1.78 | 82.6                | [23]       |
|                         | Vitellogenin mRNA          | Vg851F<br>Vg913R                                      | AGATGATGGTCAGCCCTAGACTCT<br>GGTTCATTCTGCTAAGCACCAA      | 63        | 0.2 μM   | 1.84 | 77.6                |            |
|                         | Vitellogenin receptor mRNA | Vg-R1959F<br>Vg-R2076R                                | TGAACCTTACGACATTGCCCT<br>TGTGATTTTCGGTCCAAGCCC          | 117       | 0.2 μM   | 1.95 | 76.7                | [26]       |
|                         | β-Actin mRNA               | <i>A.m.</i> β-Actin-q92F<br><i>A.m.</i> β-Actin-q157R | CGTTGTCCTCCGAGGCTCTTT<br>TGCTCATGAATACCGCAAGCT          | 66        | 0.4 μM   | 1.97 | 79.6                |            |
